# Supplementary material
Source: PubMed Central journal article supplement (PMC8349829)
Supplement: NIHMS1685789-supplement-Supplementary_Figures_and_Tables.pdf [file NIHMS1685789-supplement-Supplementary_Figures_and_Tables.pdf]

## **Supplementary Information**

### **Table of Contents**

- 1) Supplementary Figures and Figure Legends**
- 2) Supplementary Table 1: List of primers used for qPCR validation**
- 3) Supplementary Table 3: RNAseq *Dnmt3a*<sup>-/-</sup> infected vs *Dnmt3a*<sup>-/-</sup> naïve**
- 4) Supplementary Table 4: Parameters used in mosaic mouse predictions**

## Supplemental Figure S1

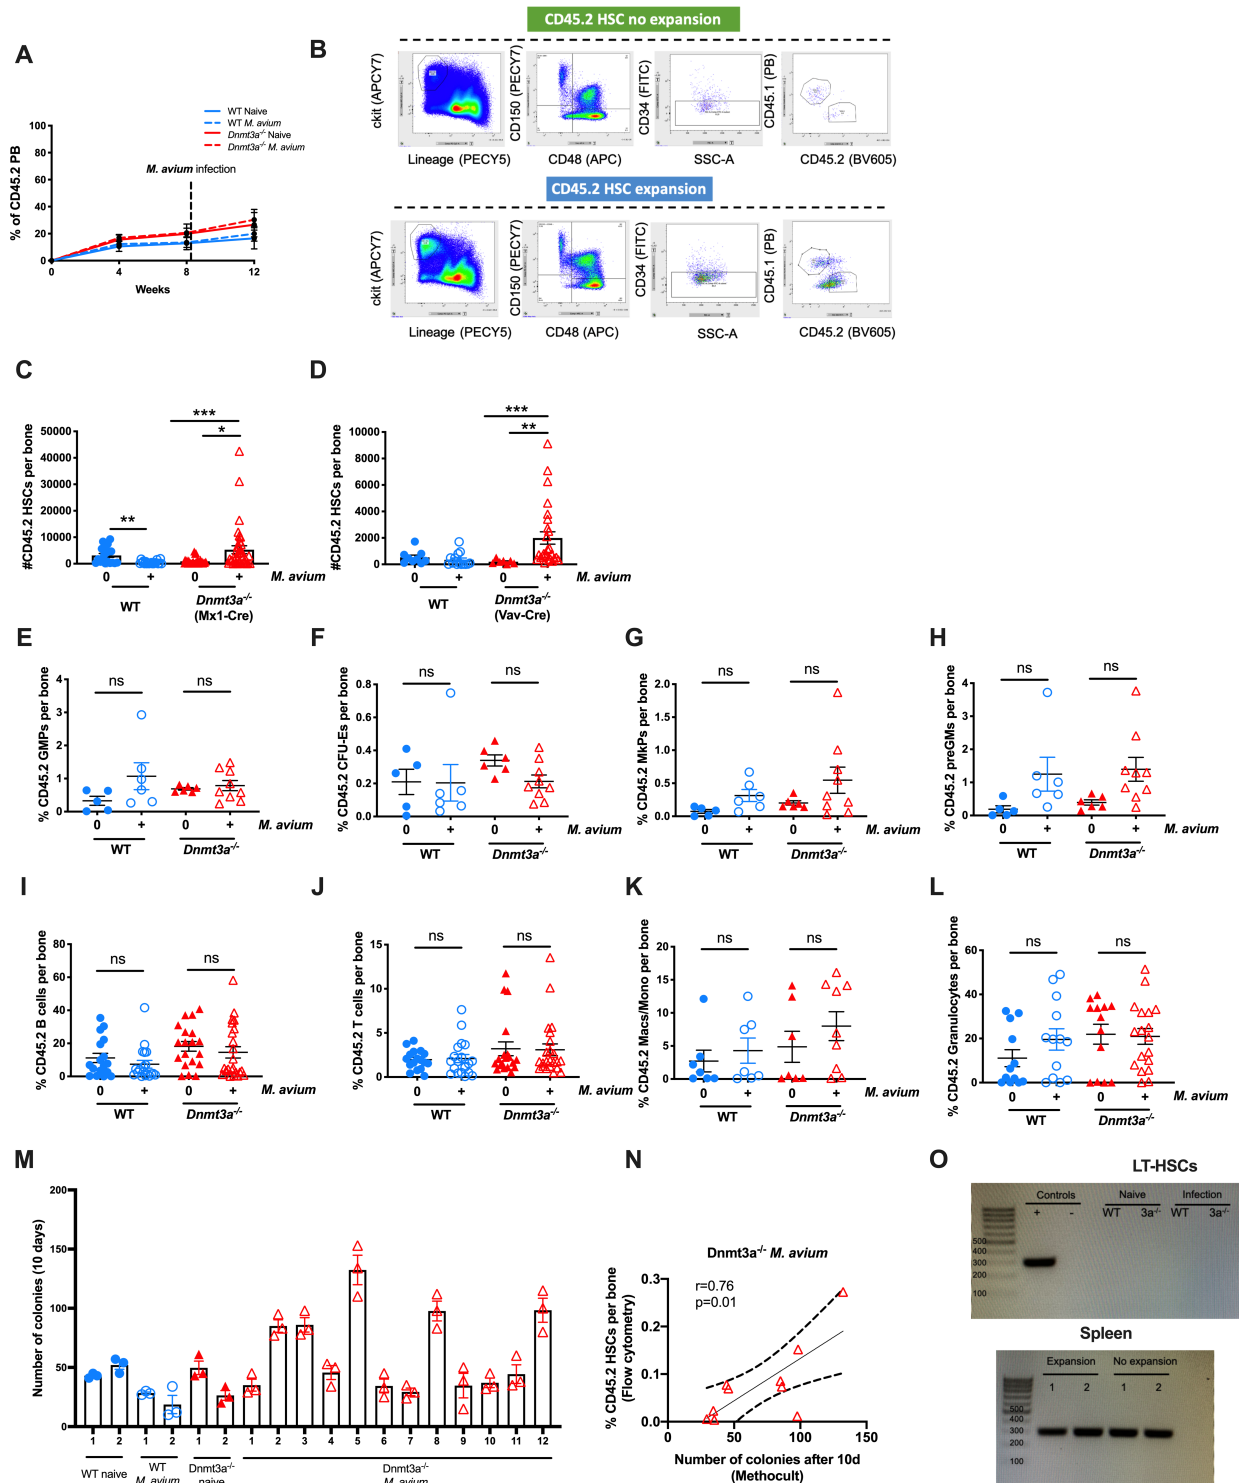

**Supplemental Figure S1: *M. avium* infection promotes *Dnmt3a*<sup>-/-</sup> clonal expansion in mice, related to Figure 1.**

(A) Analysis of percentage of CD45.2 blood cells in mosaic mice at different timepoints. Data shown are representative of others (n=3 independent experiments). (B) Representative flow plots showing the gating strategy using to identify CD45.2 and CD45.1 HSCs. (C-D) Absolute number of CD45.2 HSCs (KL CD150<sup>+</sup> CD48- CD34<sup>-</sup>) per bone that were originally from Mx1-Cre *Dnmt3a*<sup>fl/fl</sup> donors (C) or Vav-Cre *Dnmt3a*<sup>fl/fl</sup> donors (D). n=5-20 per

group; error bars, mean  $\pm$  SEM. *P* values calculated by Kruskal-Wallis test. (E-H). Percentage of CD45.2 GMPs, CFU-Es, MKPs, and preGMs of WBM in mosaic mice. Error bars, mean  $\pm$  SEM. *P* values calculated by Kruskal-Wallis test. (I-L) Percentage of CD45.2 B cells, T cells, Macs/Mono and Granulocytes of WBM in mosaic mice. Error bars, mean  $\pm$  SEM. *P* values calculated by Kruskal-Wallis test. (M) CD45.2 WBM cells from a representative of each group were sorted at the end of the experiment and plated in Methocult. The number of colonies counted after 10 days of culture per individual mouse are presented in the graph. (N) Correlation between the number of CD45.2 *Dnmt3a*<sup>-/-</sup> WBM-derived colonies from infected mice after 10 days of culture and the percentage of CD45.2 HSCs per bone found by flow cytometry for same individual mouse. (O) PCR to detect 16S *M. avium* gene in LT-HSCs (top) or spleen (bottom) from 2 mice with *Dnmt3a*<sup>-/-</sup> HSC expansion after infection and 2 mice without expansion after infection. \**p* < 0.05, \*\**p* < 0.01, \*\*\**p* < 0.001

Supplemental Figure S2

**A Peripheral blood**

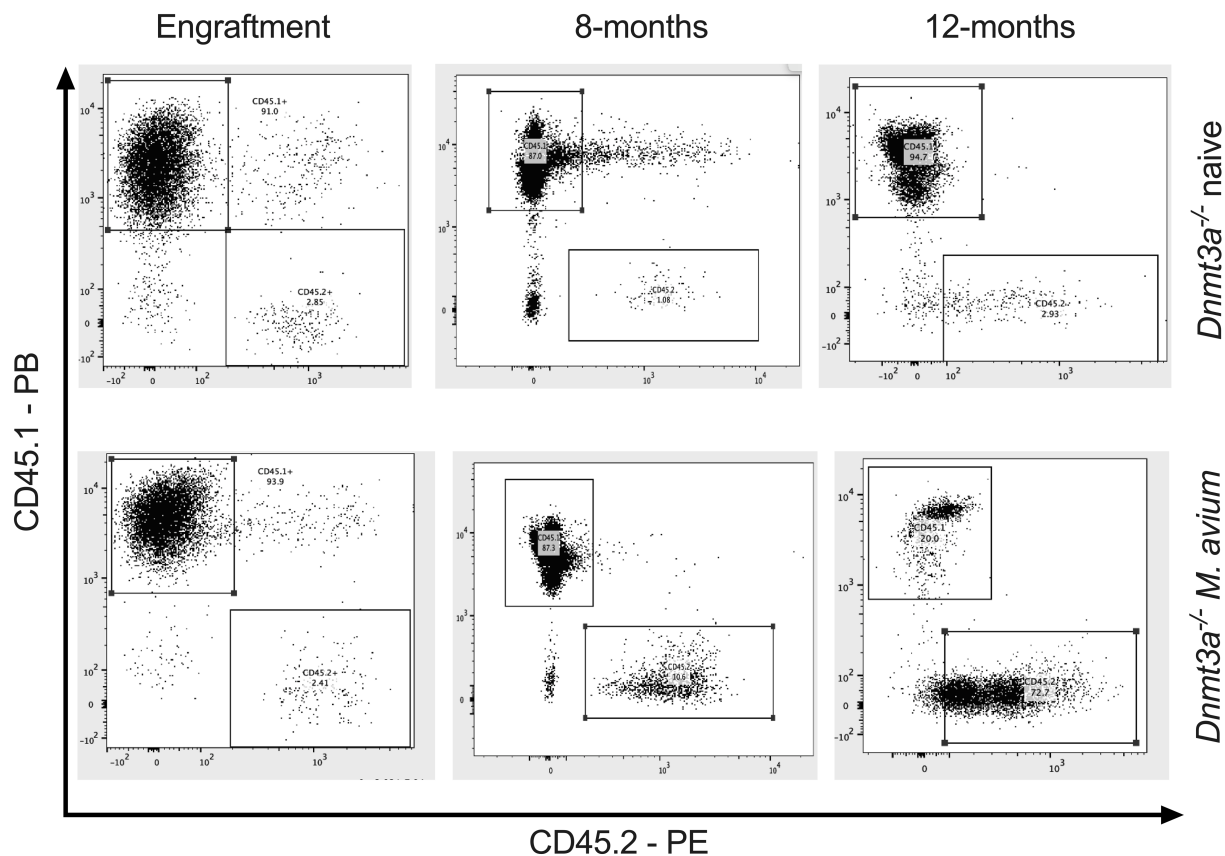

**B LT-HSCs**

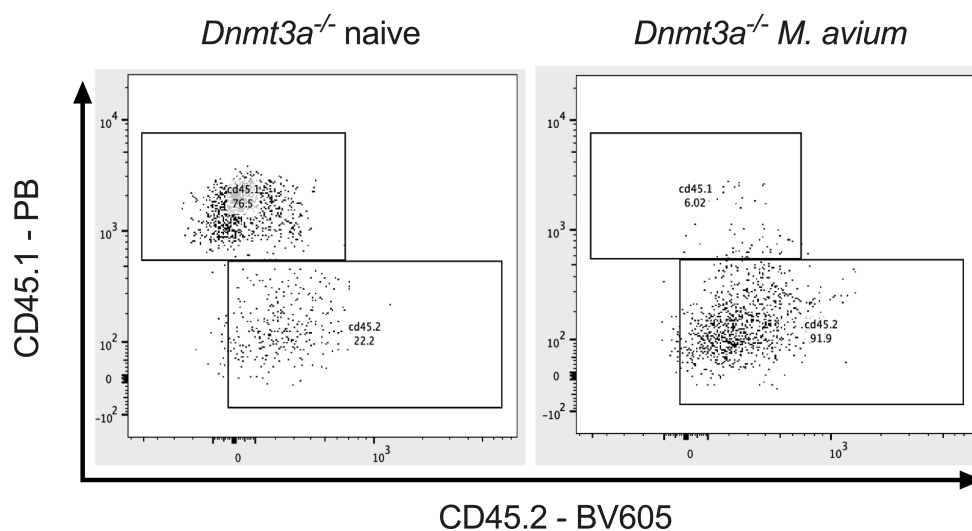

**Supplemental Figure S2: *M. avium* infection promotes *Dnmt3a*<sup>-/-</sup> PB clonal expansion in mice, related to Figure 1 and 2.** (A) Representative flow plots showing the gating strategy using to identify CD45.2 *Dnmt3a*<sup>-/-</sup> PB leukocytes and CD45.1 WT PB leukocytes in mosaic mice at engraftment and after 8-month and 12-month post-infection with *M. avium* or without infection (naïve). (B) Representative flow plots showing the gating strategy using to identify CD45.2 *Dnmt3a*<sup>-/-</sup> HSCs and CD45.1 WT HSCs in mosaic mice naïve or after 12-month post-infection with *M. avium*.

### Supplemental Figure S3

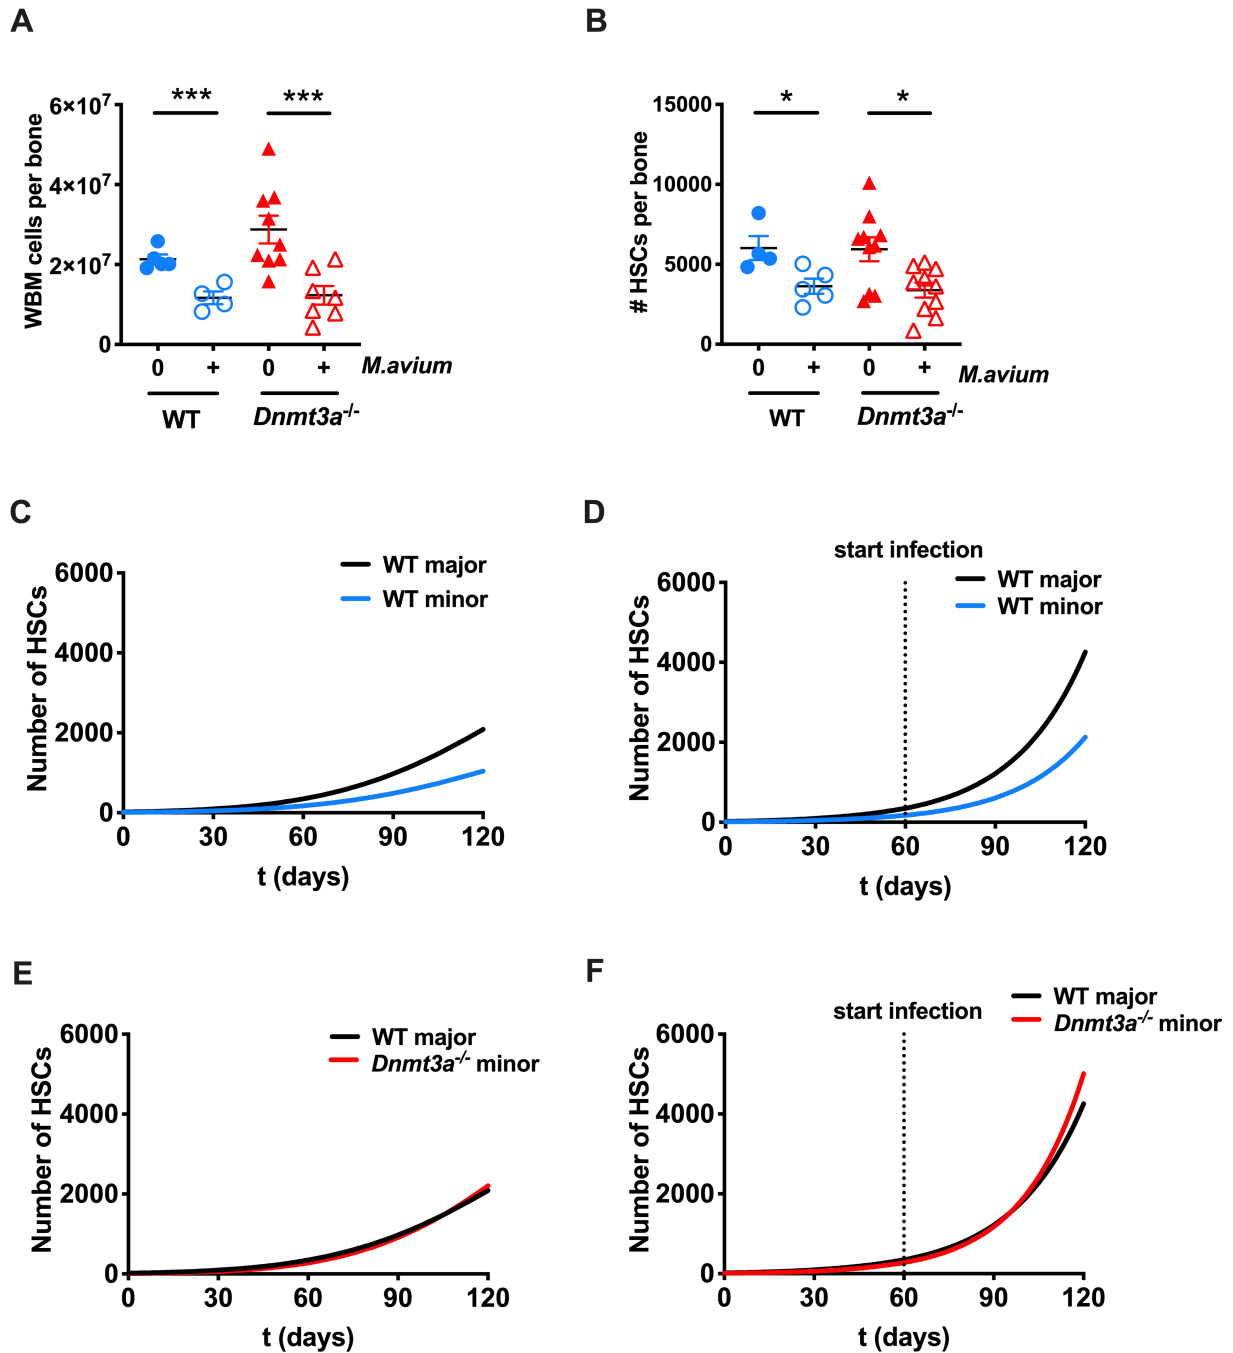

**Supplemental Figure S3. Hematological responses of *Dnmt3a*-mutant mice to infection with *M. avium* and mathematical modeling, related to Figure 3.** (A) WBM number per bone in WT and *Dnmt3a*<sup>-/-</sup> mice after one month of infection. (B) Absolute number of HSCs (KL CD150<sup>+</sup> CD48<sup>-</sup> CD34<sup>-</sup>) per bone in WT and *Dnmt3a*<sup>-/-</sup> mice after one month of infection. n=3-5 per group; data are representative of 5 independent experiments. Error bars indicate mean  $\pm$  SEM. P values calculated by two-sided t-test. (C-F) Predictive models of a major (WT) and minor (WT or *Dnmt3a*<sup>-/-</sup>) HSC population after transplant in naïve mice (C, D) or mice infected at day 60 (E, F). For additional details on modeling, please see Part 2 of Supplemental Information. \*, p < 0.05; \*\*, p < 0.01; \*\*\*, p < 0.001.

## Supplemental Figure S4

**A**

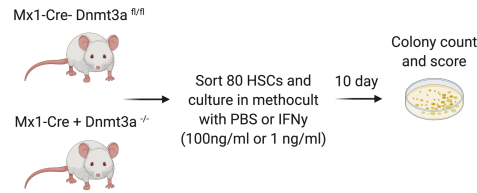

**B**

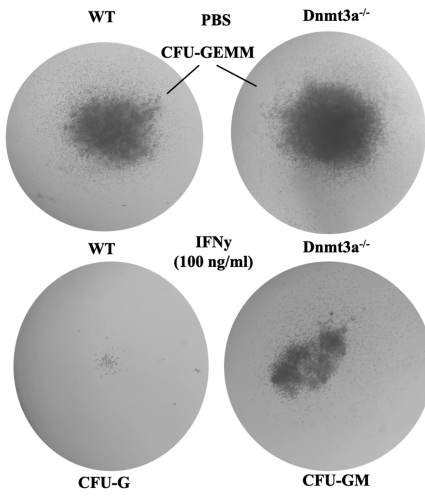

**C**

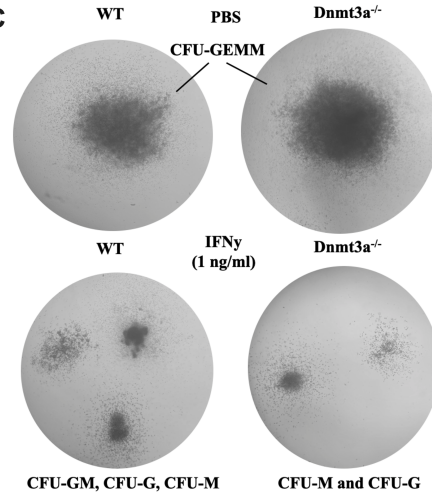

**D**

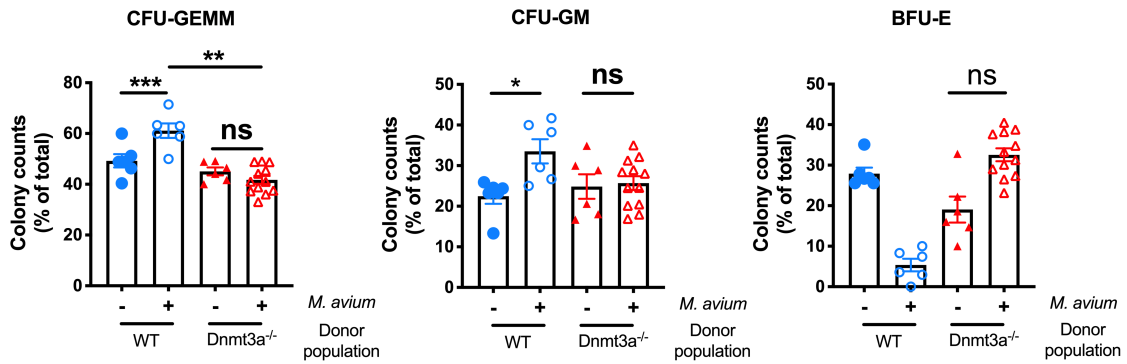

**E**

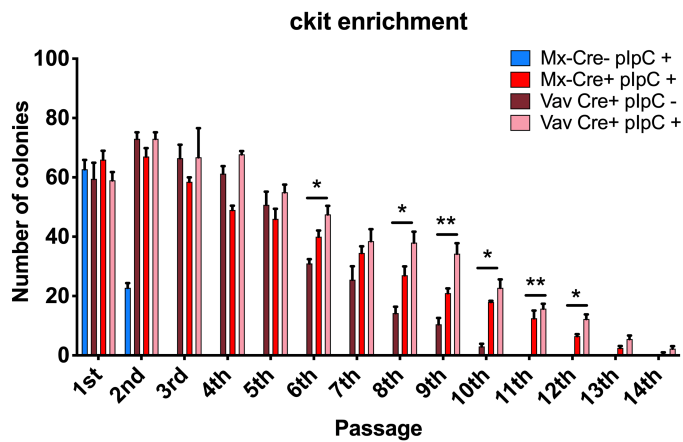

**Supplemental Figure S4. Mouse differentiation assay and serial replating assay to compare the differentiation and self-renew capacity of Dnmt3a<sup>-/-</sup> cells after inflammatory stress, related to Figure 4.** (A) Mouse differentiation assay scheme. 80 LT-HSCs (LSK CD150<sup>+</sup> CD48<sup>-</sup>) were sorted from the pool of several *Dnmt3a*<sup>+/+</sup> or *Dnmt3a*<sup>-/-</sup> mice and plated for 10 days in methocult medium in the presence or absence of IFN $\gamma$ . (B-C). Morphology of CFU-colonies after culture in methocult and treatment with high dose of IFN $\gamma$  (100 ng/ml) or low dose (1 ng/ml). Refer to Figure 4A-C. (D). CD45.2 WBM cells from individual mouse from the 4 different mosaic mice groups were sorted at the end of the experiment and plated in methocult; the morphology of colonies observed after 10 days of culture per each individual mouse was scored and is presented in the graph (E) Briefly, 500 ckit<sup>+</sup> cells were plated on Methocult media completed with SCF, IL6, TPO and FLT3-L cytokines and the number of colonies were counted after 1 week of culture. Then colonies were harvested, and 10.000 cells were replated again for 1 week, counted and replated again until no colonies were observed. Error bars, mean  $\pm$  SEM. *P* values calculated by two-way ANOVA. \*, *p* < 0.05; \*\*, *p* < 0.01; \*\*\*, *p* < 0.001.

## Supplemental Figure S5

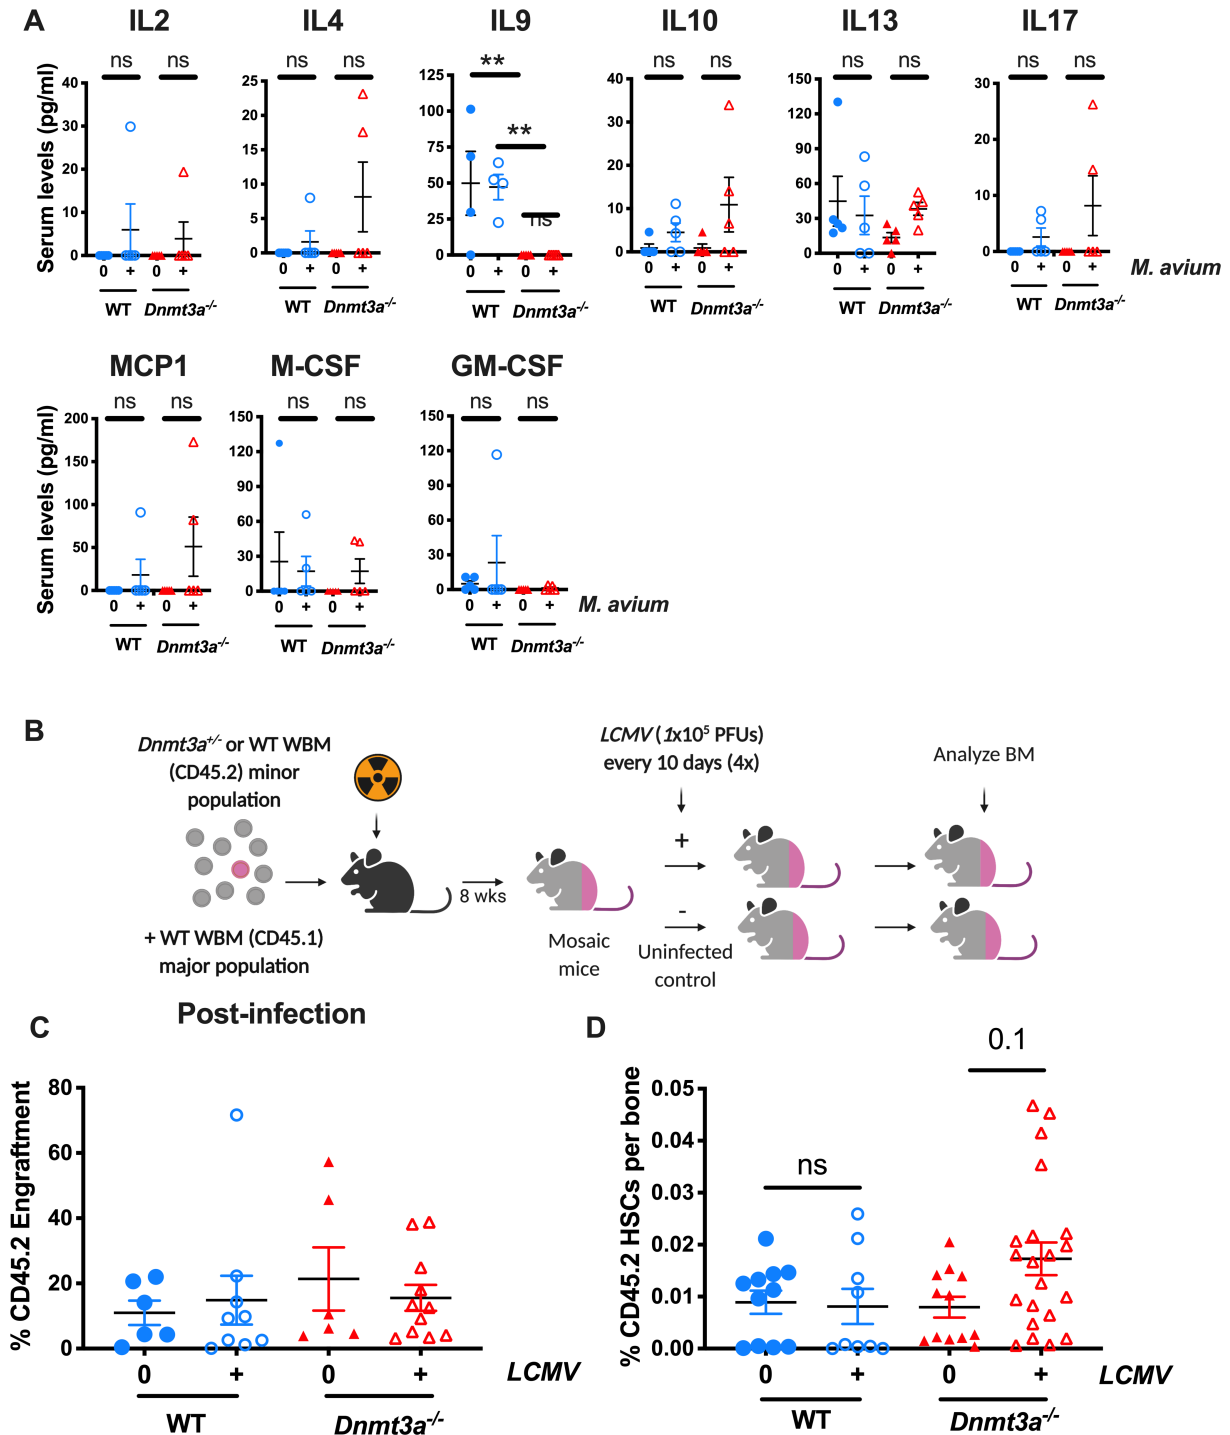

**Supplemental Figure S5. Cytokine profile and *LCMV* infections in mosaic mice, related to Figure 5. (A)** Serum cytokine levels of IL2, IL4, IL9, IL10, IL13, IL17, MCP1, M-CSF and GM-CSF in WT and *Dnmt3a*<sup>-/-</sup> (Mx1-Cre) naïve and after one month of *M. avium* infection. n=5 per group. P values calculated by ordinary one-way ANOVA or Kruskal-Wallis test. (B) Mice were transplanted with a minor population of either Cre- *Dnmt3a*<sup>fl/fl</sup> CD45.2 WBM or Cre+ *Dnmt3a*<sup>-/-</sup> CD45.2 WBM + a major population of competitive CD45.1 WBM. Two months after



transplant, mice were infected with 100000 PFUs of LCMV 4 times every 14 days. (C) Percentage of CD45.2 cells after LCMV infection. (D) CD45.2 HSCs (KL CD150+ CD48- CD34-) shown as a percentage of WBM in mosaic mice infected with LCMV. Data represent two independent experiments with n=20-40 per group. Error bars, mean  $\pm$  SEM. *P* values calculated by Kruskal-Wallis test. \*,  $p < 0.05$ ; \*\*,  $p < 0.01$ ; \*\*\*,  $p < 0.001$ .

Supplemental Figure S6

**A** Between group analysis (BGA)

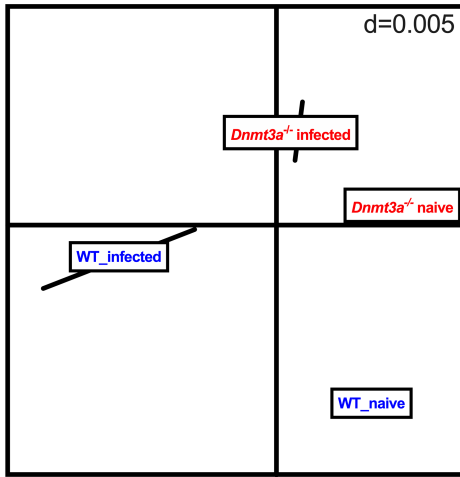

**B** Gene ontology: Genes upregulated in WT and *Dnmt3a*<sup>-/-</sup> HSCs during infection

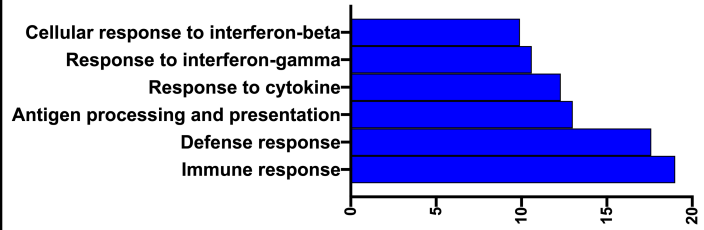

**C**

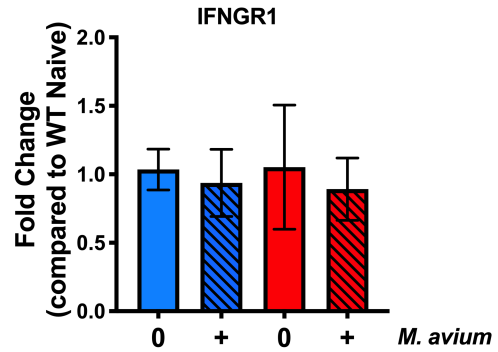

**D**

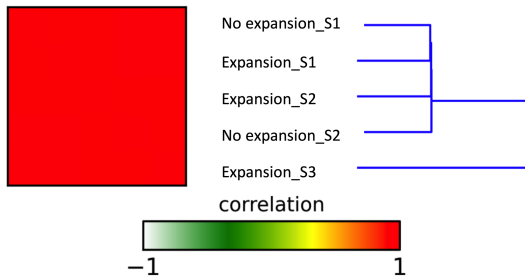

**E**

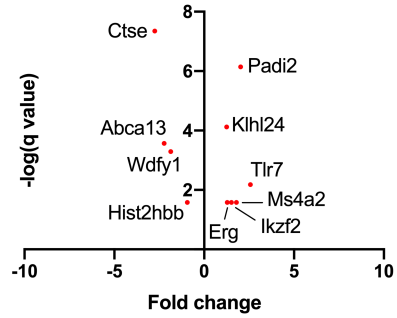

**F**

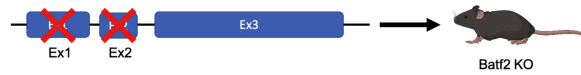

**G**

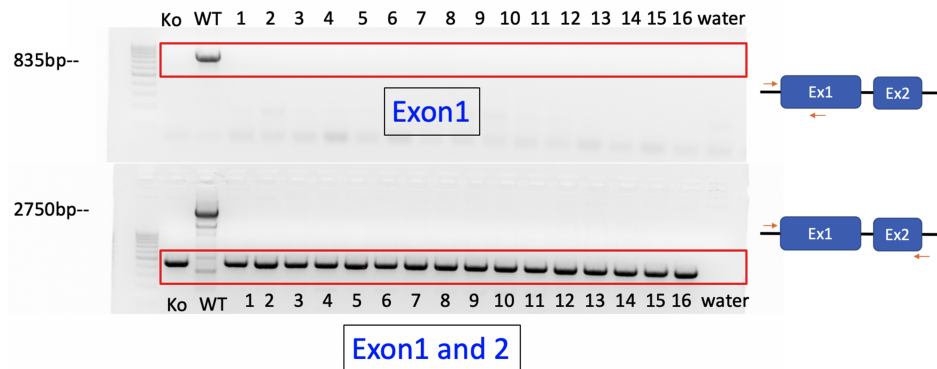

Supplemental Figure S6: Transcriptome analysis of HSCs and progenitor cells from WT and *Dnmt3a*<sup>-/-</sup> mice

**after *M. avium* infection and generation of Batf2-KO mice, related to Figure 1 (Panels S6D and S6E) and Figure 6 (Panels S6A-C and S6E).** (A) Between Group Analysis (BGA) was used to measure the relative distance between RNA samples obtained by projecting them into two-dimensional space using correspondence analysis (CoA). (B) Gene ontology analysis of pathways enriched from genes upregulated in both WT and *Dnmt3a*<sup>-/-</sup> HSCs after one month of infection. (C) *Ifngr1* expression on HSCs measured by qPCR. Error bars, mean ± SEM. *P* values calculated by Kruskal-Wallis test. (D). Clustering of RNA-seq samples in LSK cells from mosaic mice with or without *Dnmt3a*<sup>-/-</sup> HSC expansion after two months of infection with *M. avium*. **Related to Figure 1B.** (E) Volcano plot to show the genes significantly expressed in LSK cells between mosaic mice with or without *Dnmt3a*<sup>-/-</sup> HSC expansion after two months of infection with *M. avium*. **Related to Figure 1B.** (F) Batf2-KO mice were generated using CRISPR gene editing to remove exons 1 and 2 of Batf2 in a C57BL/6 background. Heterozygous mice from the initial transfer were outcrossed to WT mice and F1 pups were then crossed to generate homozygous mice. (G) Genotyping was determined by PCR, sequencing (not shown), and qPCR (not shown).

## Supplemental Figure 7

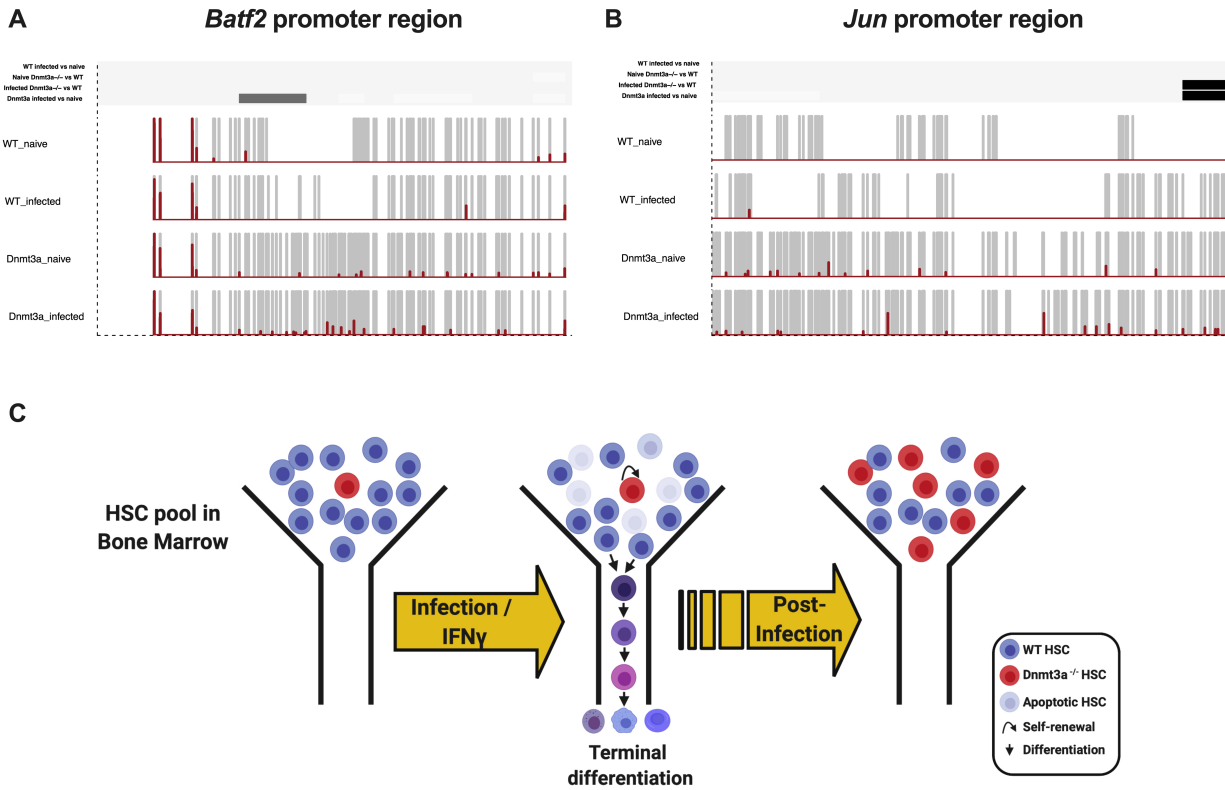

**Supplemental Figure S7: Promoters of pro-differentiation genes are hypermethylated in *Dnmt3a*<sup>-/-</sup> HSCs in infection, related to Figure 7.** (A) DNA methylation profile of *Batf2* promoter region in WT or *Dnmt3a*<sup>-/-</sup> HSCs naïve or after 1-month of infection. Significant DMRs (p value < 0.05) between groups are indicated on the top of the graph. (B) DNA methylation profile of *Jun* promoter region in WT or *Dnmt3a*<sup>-/-</sup> HSCs naïve or after 1-month of infection. Significant DMRs (p value < 0.05) between groups are indicated on the top of the graph (C) Summary of results supporting that chronic infection promotes *Dnmt3a* loss of function clonal hematopoiesis. In the presence of *M. avium* infection, WT HSCs divide and differentiate or die as a result of stress-induced apoptosis, ultimately resulting in depletion of the HSC compartment. In contrast, *Dnmt3a*<sup>-/-</sup> HSCs are relatively agnostic to the differentiation and proapoptotic cues of infection, allowing them to survive better than the WT HSC population. Over time, the number of *Dnmt3a*-loss of function HSCs overtakes the number of WT HSCs.

**Table S1: List of primers used in qPCR validations, related to Figure 6.**

| Gene name            | Forward primer        | Reverse primer           |
|----------------------|-----------------------|--------------------------|
| <i>Jun</i> (mouse)   | TGGGTGCCAACTCATGCTAA  | TCTGTCGCAACCAGTCAAGT     |
| <i>Junb</i> (mouse)  | TTGATCGTCCCCAACAGCAA  | TGACAAAACCGTCCGCAAAG     |
| <i>Jund</i> (mouse)  | TCGACATGGACACGCAAGAA  | GAGGGTCTTGACTTTCTCCTCC   |
| <i>Fos</i> (mouse)   | CTCCAAGCGGAGACAGATCAA | GCAGACCTCCAGTCAAATCCA    |
| <i>Fosb</i> (mouse)  | GACATGCCAGGAACCAGCTA  | TCTTCTTCTGGGGTAAGTGTCTC  |
| <i>Fosl</i> (mouse)  | GCTTTATCGCCTCAAGCCAAG | GTCTCAGGAGTGTCCAACCAG    |
| <i>Nr4a1</i> (mouse) | CTGCGAAAGTTGGGGGAGT   | TGAGCTTGAATACAGGGCATCT   |
| <i>Egr1</i> (mouse)  | CTGACCACAGAGTCCTTTTCT | AAGCGGCCAGTATAGGTGATG    |
| <i>Socs3</i> (mouse) | GGAGATTTTCGCTTCGGGACT | CTCGCTTTTGGAGCTGAAGG     |
| <i>Batf2</i> (mouse) | GCAACTCTGTGGGAGTAGCG  | CCACTCGGTTCTTCTGCTTCT    |
| <i>Stat1</i> (mouse) | ,GGAAGGGGCCATCACATTCA | TTCTCGGCAGCCATGACTTT     |
| <i>Gbp2</i> (mouse)  | CAAGACTCTGTGTGGTGGCA  | GTCAGCACAGCACTCTCCAT;    |
| <i>Bst2</i> (mouse)  | TCAGGAGTCCCTGGAGAAGAA | AGAAGTCTCCTTTTGGATCCTCAG |
| <i>18s</i> (mouse)   | GTAACCCGTTGAACCCATT   | CCATCCAATCGGTAGTAGCG     |

**Table S3: RNAseq *Dnmt3a*<sup>-/-</sup> infected vs *Dnmt3a*<sup>-/-</sup> naïve, related to Figure 6.**

| Gene.name | logFC | P.Value  | adj.P.Val   | Gene.description                                             |
|-----------|-------|----------|-------------|--------------------------------------------------------------|
| H2-Ab1    | 2.86  | 2.18E-17 | 1.65E-13    | histocompatibility 2, class II antigen A, beta 1             |
| Serpina3g | 2.01  | 3.38E-17 | 1.65E-13    | serine (or cysteine) peptidase inhibitor, clade A, member 3G |
| Cd74      | 2.75  | 4.69E-17 | 1.65E-13    | CD74 antigen                                                 |
| Iigp1     | 2.92  | 4.81E-17 | 1.65E-13    | interferon inducible GTPase 1                                |
| Gbp2      | 2.82  | 5.31E-16 | 1.46E-12    | guanylate binding protein 2                                  |
| Gm1966    | 2.57  | 2.49E-15 | 5.69E-12    | predicted gene 1966                                          |
| H2-Eb1    | 3.06  | 4.73E-15 | 9.26E-12    | histocompatibility 2, class II antigen E beta                |
| Gbp3      | 2.67  | 2.34E-14 | 4.01E-11    | guanylate binding protein 3                                  |
| H2-Aa     | 2.34  | 8.63E-14 | 1.32E-10    | histocompatibility 2, class II antigen A, alpha              |
| Gm8995    | 1.40  | 1.49E-13 | 2.04E-10    | predicted gene 8995                                          |
| Gbp7      | 1.89  | 1.99E-13 | 2.48E-10    | guanylate binding protein 7                                  |
| Igtp      | 2.84  | 5.94E-13 | 6.79E-10    | interferon gamma induced GTPase                              |
| Gbp5      | 2.30  | 4.72E-12 | 4.98E-09    | guanylate binding protein 5                                  |
| Gm12185   | 2.43  | 2.32E-11 | 2.27E-08    | predicted gene 12185                                         |
| Nr4a1     | -1.18 | 2.56E-11 | 2.34E-08    | nuclear receptor subfamily 4, group A, member 1              |
| Irgm1     | 2.41  | 4.51E-11 | 3.86E-08    | immunity-related GTPase family M member 1                    |
| Irf1      | 1.69  | 1.20E-10 | 9.71E-08    | interferon regulatory factor 1                               |
| Stat1     | 2.42  | 5.40E-10 | 4.12E-07    | signal transducer and activator of transcription 1           |
| Gm12250   | 2.76  | 6.80E-10 | 4.91E-07    | predicted gene 12250                                         |
| Serpina3f | 4.19  | 7.84E-10 | 5.38E-07    | serine (or cysteine) peptidase inhibitor, clade A, member 3F |
| Tgtp2     | 1.56  | 2.47E-09 | 1.61E-06    | T cell specific GTPase 2                                     |
| Gm4951    | 2.83  | 3.24E-09 | 2.02E-06    | predicted gene 4951                                          |
| Samhd1    | 1.33  | 4.16E-09 | 2.48E-06    | SAM domain and HD domain, 1                                  |
| Thbs1     | -3.44 | 7.29E-09 | 4.16E-06    | thrombospondin 1                                             |
| Irgm2     | 1.77  | 9.98E-09 | 5.47E-06    | immunity-related GTPase family M member 2                    |
| Csf2rb    | 2.84  | 1.32E-08 | 6.98E-06    | colony stimulating factor 2 receptor, beta, low-affinity     |
| Gbp4      | 2.71  | 2.34E-08 | 1.19E-05    | guanylate binding protein 4                                  |
| Txnip     | -0.91 | 3.38E-08 | 1.65E-05    | thioredoxin interacting protein                              |
| Gm10925   | -2.52 | 3.61E-08 | 1.70E-05    | predicted gene 10925                                         |
| Tap1      | 1.15  | 3.73E-08 | 1.70E-05    | transporter 1, ATP-binding cassette, sub-family B (MDR/TAP)  |
| Dtx3l     | 1.13  | 3.94E-08 | 1.74E-05    | deltex 3-like, E3 ubiquitin ligase                           |
| Plac8     | 3.41  | 8.25E-08 | 3.54E-05    | placenta-specific 8                                          |
| Car1      | -2.04 | 8.63E-08 | 3.58E-05    | carbonic anhydrase 1                                         |
| Itsn1     | -1.04 | 1.62E-07 | 6.52E-05    | intersectin 1 (SH3 domain protein 1A)                        |
| Tgtp1     | 2.77  | 7.49E-07 | 0.000293692 | T cell specific GTPase 1                                     |
| Csf2rb2   | 2.90  | 7.98E-07 | 0.000303915 | colony stimulating factor 2 receptor, beta 2, low-affinity   |
| Ciita     | 2.44  | 8.45E-07 | 0.000313103 | class II transactivator                                      |
| Parp9     | 1.78  | 1.56E-06 | 0.000561462 | poly (ADP-ribose) polymerase family, member 9                |
| Top2a     | 0.93  | 1.61E-06 | 0.00056695  | topoisomerase (DNA) II alpha                                 |
| F2r       | 0.95  | 1.67E-06 | 0.000573393 | coagulation factor II (thrombin) receptor                    |
| Tapbp     | 0.95  | 1.87E-06 | 0.000625568 | TAP binding protein                                          |
| Prg2      | -7.16 | 2.74E-06 | 0.000895038 | proteoglycan 2, bone marrow                                  |
| Zbp1      | 2.55  | 2.90E-06 | 0.000925633 | Z-DNA binding protein 1                                      |
| Ly6a      | 2.28  | 3.03E-06 | 0.000946052 | lymphocyte antigen 6 complex, locus A                        |
| Ly6e      | 0.89  | 4.54E-06 | 0.001382378 | lymphocyte antigen 6 complex, locus E                        |
| Gm15501   | -1.53 | 5.35E-06 | 0.001595427 | predicted pseudogene 15501                                   |
| Oasl2     | 1.21  | 5.47E-06 | 0.001595427 | 2'-5' oligoadenylate synthetase-like 2                       |
| Psmb8     | 0.90  | 5.86E-06 | 0.001640052 | proteasome (prosome, macropain) subunit, beta type 8         |

|            |       |          |             |                                                              |
|------------|-------|----------|-------------|--------------------------------------------------------------|
| Wars       | 1.30  | 5.86E-06 | 0.001640052 | tryptophanyl-tRNA synthetase                                 |
| Mpo        | -0.88 | 6.96E-06 | 0.001909998 | myeloperoxidase                                              |
| mt-Atp6    | -2.42 | 7.33E-06 | 0.001970914 | mitochondrially encoded ATP synthase 6                       |
| H2-T23     | 0.88  | 8.51E-06 | 0.002245169 | histocompatibility 2, T region locus 23                      |
| Gm10801    | -2.14 | 8.73E-06 | 0.002260538 | predicted gene 10801                                         |
| Dusp4      | -1.29 | 1.05E-05 | 0.002659386 | dual specificity phosphatase 4                               |
| Ifi47      | 1.49  | 1.29E-05 | 0.003204664 | interferon gamma inducible protein 47                        |
| Cd274      | 1.43  | 1.90E-05 | 0.004646788 | CD274 antigen                                                |
| Hlf        | -0.82 | 2.01E-05 | 0.004831274 | hepatic leukemia factor                                      |
| Trib2      | -2.13 | 2.52E-05 | 0.00596244  | tribbles pseudokinase 2                                      |
| Parp14     | 1.06  | 2.77E-05 | 0.006442153 | poly (ADP-ribose) polymerase family, member 14               |
| Uba7       | 0.95  | 2.89E-05 | 0.006615639 | ubiquitin-like modifier activating enzyme 7                  |
| Nr4a2      | -1.14 | 3.14E-05 | 0.007070334 | nuclear receptor subfamily 4, group A, member 2              |
| Pygm       | -1.59 | 3.34E-05 | 0.007391201 | muscle glycogen phosphorylase                                |
| H2-T22     | 0.94  | 3.77E-05 | 0.008208401 | histocompatibility 2, T region locus 22                      |
| Gm10800    | -1.35 | 4.46E-05 | 0.009564986 | predicted gene 10800                                         |
| Elane      | -1.33 | 4.61E-05 | 0.009732215 | elastase, neutrophil expressed                               |
| Gbp8       | 2.52  | 4.69E-05 | 0.009752281 | guanylate-binding protein 8                                  |
| Gm11168    | -1.56 | 5.13E-05 | 0.010501549 | predicted gene 11168                                         |
| Rnf213     | 0.63  | 5.25E-05 | 0.010584641 | ring finger protein 213                                      |
| Xist       | -0.62 | 5.57E-05 | 0.011063578 | inactive X specific transcripts                              |
| Aplp2      | -0.76 | 5.75E-05 | 0.01126569  | amyloid beta (A4) precursor-like protein 2                   |
| Gm15500    | -1.30 | 6.04E-05 | 0.011662312 | predicted pseudogene 15500                                   |
| Nampt      | 1.15  | 6.61E-05 | 0.012591438 | nicotinamide phosphoribosyltransferase                       |
| Ifi203     | 1.07  | 7.87E-05 | 0.014699307 | interferon activated gene 203                                |
| Mndal      | 1.26  | 7.93E-05 | 0.014699307 | myeloid nuclear differentiation antigen like                 |
| Serp1b1a   | 1.52  | 8.74E-05 | 0.015982047 | serine (or cysteine) peptidase inhibitor, clade B, member 1a |
| Irf7       | 1.78  | 8.86E-05 | 0.015986803 | interferon regulatory factor 7                               |
| Fgd5       | -0.99 | 9.63E-05 | 0.016956587 | FYVE, RhoGEF and PH domain containing 5                      |
| H2-DMa     | 1.31  | 9.70E-05 | 0.016956587 | histocompatibility 2, class II, locus Dma                    |
| Cyp26b1    | -2.64 | 9.77E-05 | 0.016956587 | cytochrome P450, family 26, subfamily b, polypeptide 1       |
| Rpl23a-ps3 | -1.44 | 1.12E-04 | 0.019169913 | ribosomal protein L23A, pseudogene 3                         |
| Psmb9      | 1.15  | 1.18E-04 | 0.019874224 | proteasome (prosome, macropain) subunit, beta type 9         |
| Ifitm3     | 0.99  | 1.19E-04 | 0.019874224 | interferon induced transmembrane protein 3                   |
| Myom1      | -0.95 | 1.34E-04 | 0.02211946  | myomesin 1                                                   |
| Nlre5      | 0.80  | 1.35E-04 | 0.02211946  | NLR family, CARD domain containing 5 [                       |
| Oas3       | 1.47  | 1.38E-04 | 0.022228223 | 2'-5' oligoadenylate synthetase 3                            |
| H2-Q7      | 0.73  | 1.40E-04 | 0.022378784 | histocompatibility 2, Q region locus 7                       |
| Clea3a1    | 1.30  | 1.89E-04 | 0.029848832 | chloride channel accessory 3A1                               |
| Gm10275    | -1.37 | 2.13E-04 | 0.033256064 | predicted pseudogene 10275                                   |
| Cxcl9      | 7.03  | 2.19E-04 | 0.033711588 | chemokine (C-X-C motif) ligand 9                             |
| Rps23-ps1  | -1.12 | 2.25E-04 | 0.03428905  | ribosomal protein S23, pseudogene 1                          |
| Gm4070     | 1.27  | 2.34E-04 | 0.035333318 | predicted gene 4070                                          |
| Cdk6       | 0.56  | 2.52E-04 | 0.037550023 | cyclin-dependent kinase 6                                    |
| Rpl14-ps1  | -1.20 | 2.55E-04 | 0.037550023 | ribosomal protein L14, pseudogene 1                          |
| Rarg       | -1.36 | 2.72E-04 | 0.039671525 | retinoic acid receptor, gamma                                |
| Btg2       | -0.71 | 3.11E-04 | 0.04490177  | B cell translocation gene 2, anti-proliferative              |
| Stat2      | 1.41  | 3.24E-04 | 0.04633537  | signal transducer and activator of transcription 2           |
| Slfn2      | 2.21  | 3.31E-04 | 0.046872047 | schlafen 2                                                   |
| Tns2       | -1.35 | 3.40E-04 | 0.047590322 | tensin 2                                                     |
| Muc13      | 0.65  | 3.58E-04 | 0.049583497 | mucin 13, epithelial transmembrane                           |

**Table S4: Parameters used in mosaic mouse predictions, related to STAR methods and Figure S3.**

| Genotype of minor population; condition:      | Minor<br>$N(0)$ | Major<br>$N(0)$ | Minor<br>$\lambda_0 - \lambda_1$ | Major<br>$\lambda_0 - \lambda_1$ | Minor<br>$d$ | Major<br>$d$ | Minor<br>$N(120)$ | Major<br>$N(120)$ |
|-----------------------------------------------|-----------------|-----------------|----------------------------------|----------------------------------|--------------|--------------|-------------------|-------------------|
| <b>WT; naive</b>                              | 10              | 20              | .071 - .026                      | .071 - .026                      | .104         | .104         | 1044              | 2088              |
| <b>WT; infection</b>                          | 10              | 20              | .071 - .071                      | .071 - .071                      | .208         | .208         | 2128              | 4256              |
| <b><i>Dnmt3a</i><sup>-/-</sup>; naive</b>     | 10              | 20              | .068 - .025                      | .071 - .026                      | .013         | .104         | 2206              | 2088              |
| <b><i>Dnmt3a</i><sup>-/-</sup>; infection</b> | 10              | 20              | .056 - .056                      | .071 - .071                      | .072         | .208         | 5010              | 4256              |

1. The basis for predicting dynamics of two competing populations of HSCs is the differential equation of the form  $\dot{N}(t) = -\lambda(t)N(t) + 2(1 - d)\lambda(t)N(t)$ , where  $N(t)$  is the HSC count at time  $t$ ,  $\lambda(t)$  is the division rate of the HSC time-varying according to expression  $\lambda(t) = \lambda_0 + (\lambda_1 - \lambda_0)t/120$  (time in days,  $\lambda$ 's in day<sup>-1</sup>), and  $d$  is the fraction of HSC progeny that are not HSC (i.e. that constitutes HSC “loss”) <sup>17</sup>. We calculated  $\lambda_0$  and  $\lambda_1$  and  $N(t)$  values from Ki67 (Figure 1C) and flow cytometric analysis of HSC counts in WT or *Dnmt3a*<sup>-/-</sup> mice with or without chronic *M. avium* infection (Figure 1G). We further calculated  $d$  for infected versus uninfected states (Figure 1H). The  $\lambda_0 - \lambda_1$  and  $d$  values were then used to predict  $N(t)$  from a starting set of 10 “minor population” HSCs and 20 “major population” (competitor) HSCs in post-transplant mice with or without infection introduced at 60 days post-transplant. Mathematical details and further illustrations are found in the Supplementary Information: Modeling and estimation of parameters for mosaic mice predictions.
